# Supplementary material for: Exacerbation-like respiratory symptoms in individuals without chronic obstructive pulmonary disease: results from a population-based study
Source: PubMed Central journal article supplement — Thorax. 2014 Apr 4;69(8):709–17. doi: 10.1136/thoraxjnl-2013-205048 (PMC4112491; doi:10.1136/thoraxjnl-2013-205048), 2014-04-04
Supplement: thoraxjnl-2013-205048-s2.pdf [file thoraxjnl-2013-205048-s2.pdf]

Supplementary figure

**Mean Emphysema Score<sup>1</sup> of CanCOLD Subjects who have Experienced Exacerbations in the Past One Year vs. those who have not.**

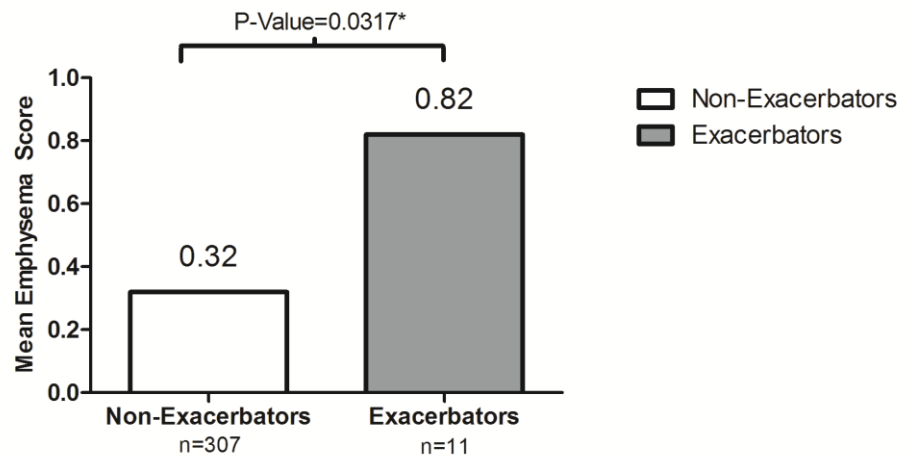

<sup>1</sup> Emphysema Score is defined by the sum of the right and left extent upper, middle, and lower lungs.

\* P-Value is obtained by comparing the 2 groups using the Kruskal Wallis test
